# Supplementary material for: Developing a Stabilizing Formulation of a Live Chimeric Dengue Virus Vaccine Dry Coated on a High-Density Microarray Patch
Source: MDPI journal article supplement (doi:10.3390/vaccines9111301), 2021-11-09
Supplement: s1 [file s1]

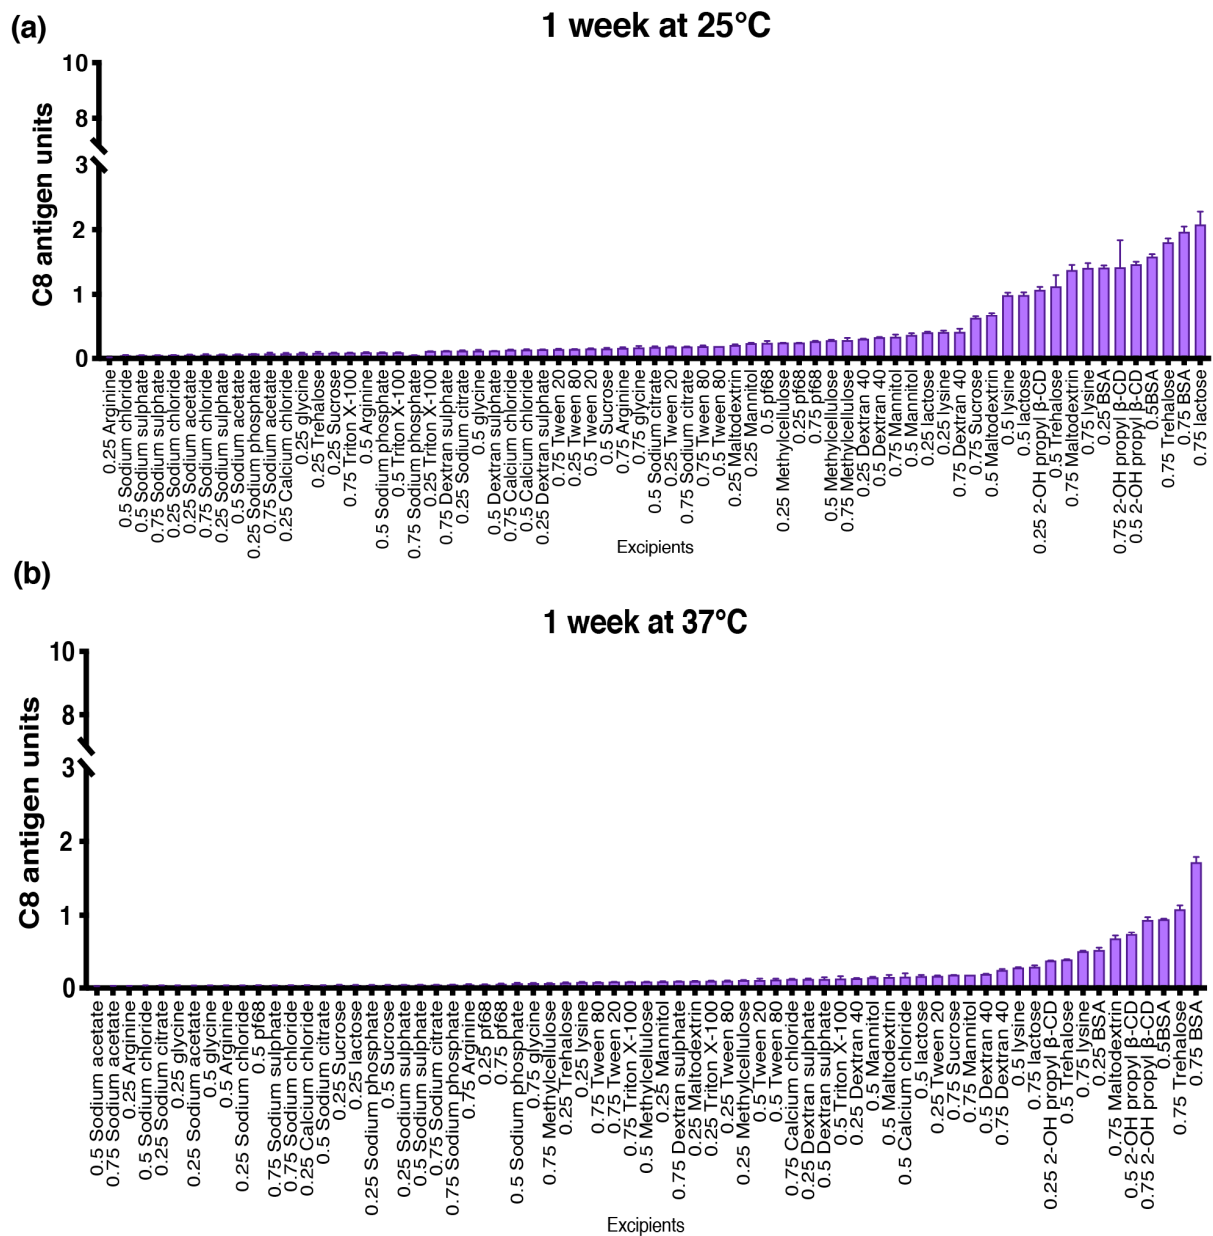

**Figure S1.** Effects of individual excipients on bDENV2 antigen recovery **(a)** after storage for 7 days at 25 °C and **(b)** after storage for 7 days at 37 °C. Each condition is shown as a relative percentage recovery of bDENV2 antigen normalized to a bDENV2 stock liquid control (100%). Note: Excipients were prepared in a low salt base buffer. Error bars represent SEM from triplicate experiments.

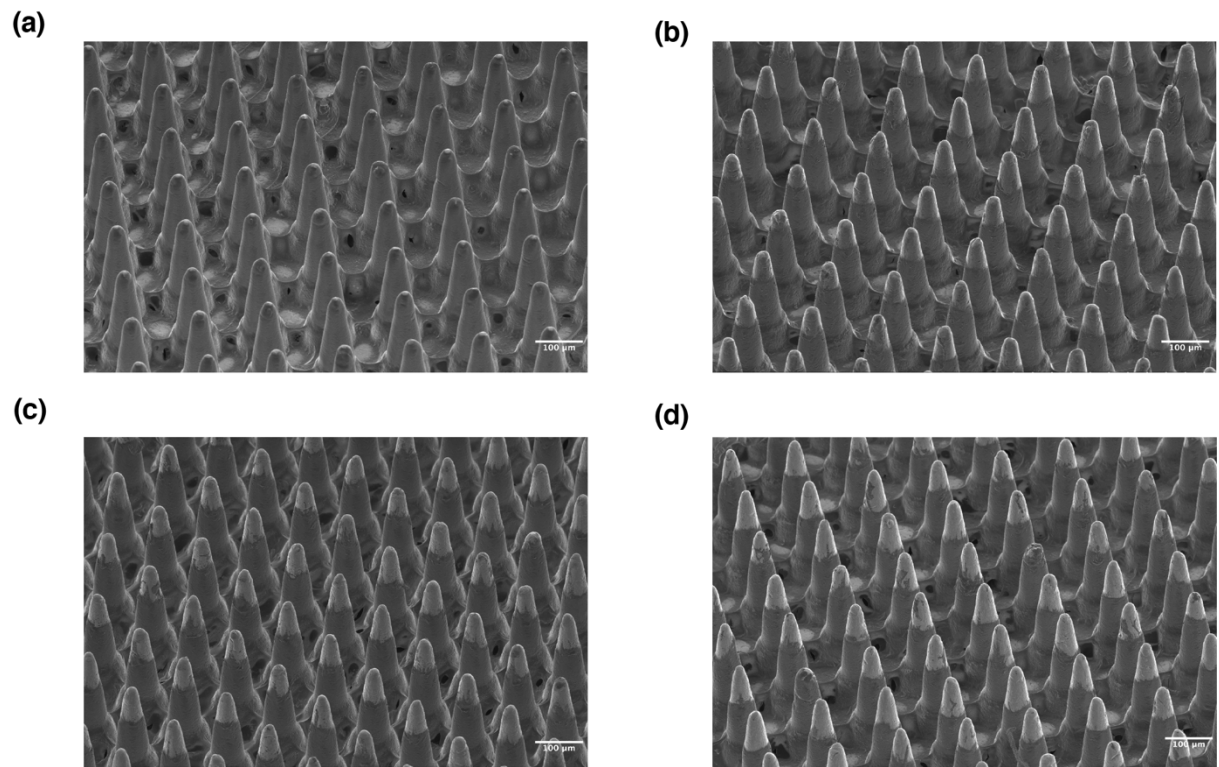

**Figure S2.** SEM images of (a) HD-MAP coated with bDENV2, (b) bDENV2-immediate HD-MAP post application, (c) bDENV2-2weeks HD-MAP post application, and (d) bDENV2-1month HD-MAP post application.
